# Supplementary material
Source: PubMed Central journal article supplement (PMC3096721)

**A****Supp. figure 2A**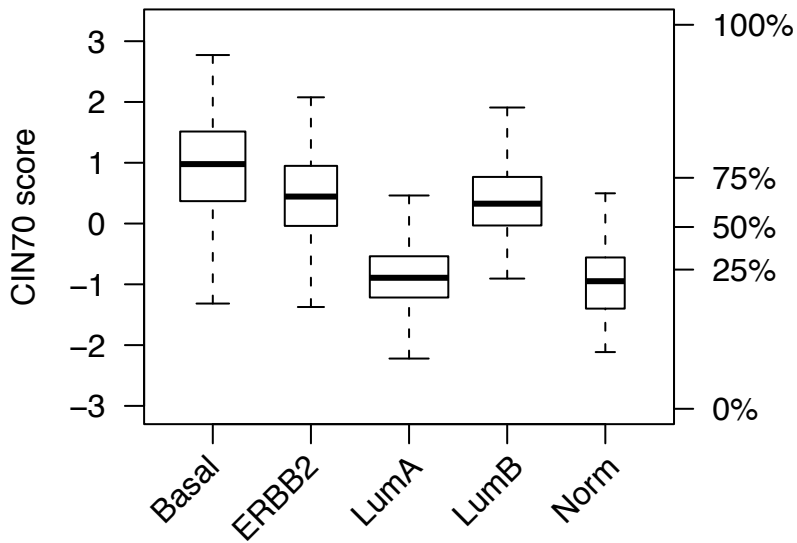**B****Supp. figure 2B**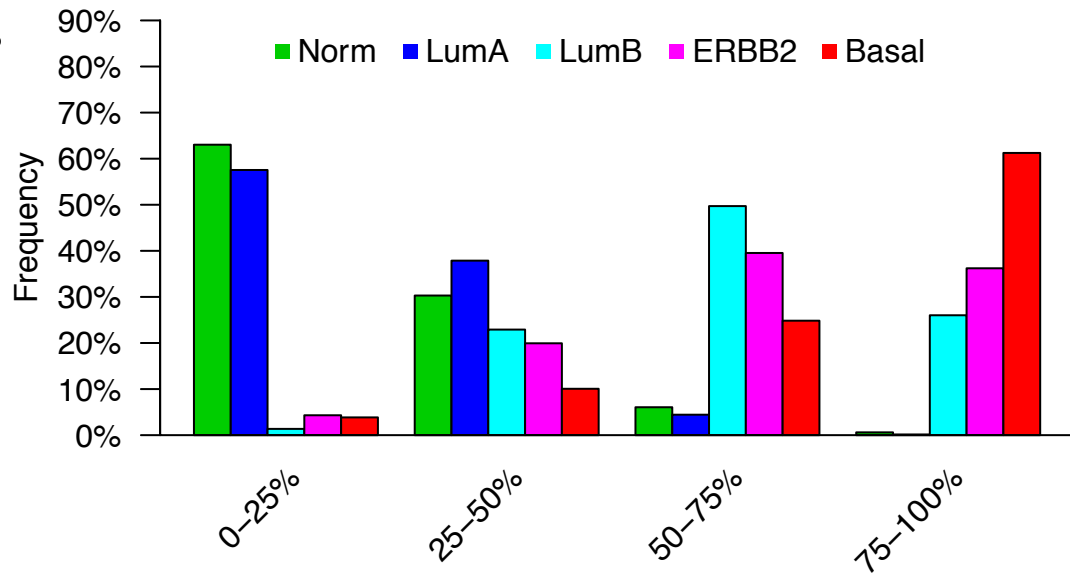

Supplement: NIHMS269279-supplement-3.pdf [file NIHMS269279-supplement-3.pdf]

**Supp. Fig. 5**

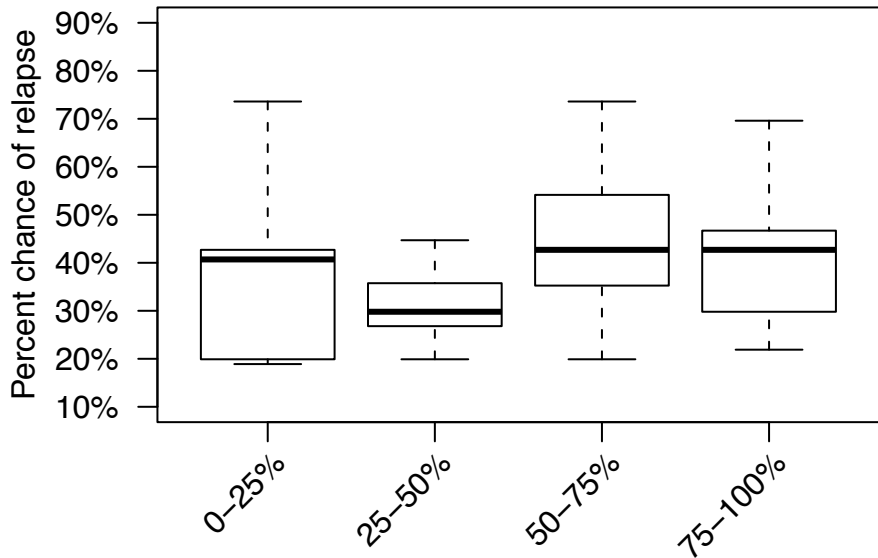

Supplement: NIHMS269279-supplement-6.pdf [file NIHMS269279-supplement-6.pdf]
